# Supplementary material for: A Study on the Needs for Mental Health Courses for Middle School Students Based on Qualitative Interviews from Diverse Perspectives
Source: Research Square preprint supplement (doi:10.21203/rs.3.rs-7165019/v1), 2025-09-11
Supplement: Supplementary file 1 [file 74d947230f3399397f0b57a2.docx]

Questionnaire on Curriculum Design of Mental Health Education for Middle School Students (Parents Version)

**Dear Sir/Madam! We appreciate you taking the time out of your hectic day to fill out this survey. The "curriculum design of mental health education for junior high school students" is the subject of this survey. It aims to understand the needs of mental health education for middle school students. I'm hoping for your assistance. Future courses on teenage mental health will benefit from your insightful feedback! Your present job and personal life won't be impacted by this anonymous survey. The investigator will maintain complete confidentiality regarding any information gathered during the survey. Again, I want to thank you for all of your help and support. I want everything the best for you and your health! This survey is entirely voluntary. If you are aware of and agree with the above instructions, please fill in the date of the day below:**

Date: [fill in the blank]

_________________________________

Your gender: [Multiple choice]*

| ○ Male |
| --- |
| ○ Female |

Your age:*

_________________________________

Your occupation is (in no order):[Single choice question]*

| ○A. Administrative personnel of government organs, enterprises and institutions |
| --- |
| B. Educators |
| ○C. Health workers |
| D. Military |
| ○E. Legal workers |
| F. Industrial workers |
| G. Agricultural workers |
| H. Commercial and service workers |
| ○I. Scientific personnel |
| ○J. Freelancers |
| ○K. Other_________________ |

4. Your first degree is: [Multiple choice questions]*

| ○A. Primary |
| --- |
| ○B. Junior high school |
| ○C. High school (secondary school) |
| ○D. Junior college |
| ○E. Undergraduate courses |
| F. Masters |
| Dr. G. |

5. What do you think should be included in the psychological education curriculum for junior high school children? [Multiple choice questions]*

| □A. Master learning methods and enhance interest in learning |
| --- |
| □B. Training students 'thinking, attention and memory skills |
| C. Interpersonal communication skills: learn to communicate with parents, teachers and classmates |
| □D. Life education: cherish life, stay away from danger, and cultivate a positive and optimistic attitude towards life |
| □E. Emotional management: anger, depression, irritability, etc. |
| □F. Cultivation of behavior habits: life rules, independent learning, and adherence to exercise |
| □G. Sexual psychology: sexual education content such as getting along with the opposite sex and awakening sexual consciousness |
| □H. Traditional moral culture education: respect teachers, respect the elderly and love the young |
| □I. Stress management: adaptability, such as coping with setbacks and failures in life and study, coping with sudden major changes and major psychological events; non-adaptive stress management, such as Internet addiction, mobile phone addiction, drug abuse, excessive drinking, etc. |
| □J. Others: _________________ |

6. According to the psychological state of junior high school children, formulate different grades (first two three), mental health education curriculum, do you think there is a need to distinguish? [Multiple choice]*

| A. Needs |
| --- |
| B. Not required |

7. If so, what do the children need to focus on in the first grade: [Multiple choice questions]*

| A. Adapt to junior high school life and learning environment |
| --- |
| B. Guidance on learning methods |
| C. Interpersonal communication skills |
| D.Dealing with the opposite sex |
| E. Stress management |
| F. Emotional regulation |
| G. Education for life |
| H. Traditional moral education |
| I. Other________________ |

8. If necessary, what content should the second grade children focus on: [Multiple choice questions]*

| A. Adapt to junior high school life and learning environment |
| --- |
| B. Guidance on learning methods |
| C. Interpersonal communication skills |
| D. Dealing with the opposite sex |
| E. Stress management |
| F. Emotional regulation |
| G. Education for life |
| H. Traditional moral education |
| I. Other________________ |

9. If necessary, what content should the third grade children focus on: [Multiple choice questions]*

| A. Adapt to junior high school life and learning environment |
| --- |
| B. Guidance on learning methods |
| C. Interpersonal communication skills |
| D. Dealing with the opposite sex |
| E. Stress management |
| F. Emotional regulation |
| G. Education for life |
| H. Traditional moral education |
| I. Other________________ |

10. What kind of form do you think can be adopted for psychological education courses for junior high school children, and what kind of form is better? [Multiple choice questions]*

| A. Role play |
| --- |
| B. Scenario simulation |
| C. Group learning |
| D. Class meeting lectures |
| E. Written information (pamphlets) |
| G. Video |
| I. Others: _________________ |

11. Do you think junior high school teachers need to study together in psychological education curriculum for junior high school children? [Multiple choice]*

| A. Needs |
| --- |
| B. Not required |

12. If necessary, select what you want to know and list the importance: [Multiple choice questions]*

| A. Master learning methods, enhance learning interest, |
| --- |
| B. Training students 'thinking, attention and memory skills |
| C. Interpersonal communication skills |
| D. Education for life |
| E. Emotional management |
| F. Stress management |
| G. Behavioral habits |
| H. Psychosexual aspects |
| I. Traditional moral education |
| J. Identification of anxiety and depression |
| K. Early recognition of psychosis |
| L. Other_________________ |

13. For the psychological education courses for junior high school students, what do you think is the appropriate class hours per semester: [Multiple choice questions]*

| A. 6-8 class |
| --- |
| B.10-12 lessons |
| C.14-16 lessons |
| D. 18 -20 lessons |
| E.20-24 lessons |
| F. More than 24 lessons |

14. How do you think the psychological education curriculum for junior high school students should be set up? [Multiple choice]*

| A. Courses devoted to psychological education |
| --- |
| B. Integration with class meetings |
| C. Integration with ethics and law courses |
| D. Other_________________ |

15. Who do you think should be the speaker of psychological education courses for junior high school students? [Multiple choice]*

| A. School psychology teacher |
| --- |
| B. Head teacher |
| C. School-appointed teacher |
| D. Hire professional psychosocial teachers |
| E. Other (please specify)_________________ |

16. If the psychological education courses for junior high school students are taught by school teachers, do you think it is necessary to receive corresponding training? [Multiple choice]*

| A. Needs |
| --- |
| B. Not required |
| C. Other (please specify) |

17. Do you think parents need to participate in the psychological education curriculum for junior high school students? [Multiple choice]*

| A needs |
| --- |
| B Not required |

18. What do you think parents need to learn about the psychological education curriculum for junior high school students and its importance include: [Multiple choice questions]*

| A. Interpersonal communication skills, learn to communicate with children |
| --- |
| B. Life education, cherish life, stay away from danger, and cultivate a positive and optimistic attitude towards life |
| C. Self-management of negative emotions (anger, depression, irritability, etc.) |
| D. Stress management |
| E. Content related to psychosexual education of children |
| F. Traditional moral education |
| G. Recognition of anxiety and depression |
| H. Early recognition of psychosis |
| I. Others |

19. Does your child's school have a special mental health education curriculum? [Multiple choice]*

| A. Yes |
| --- |
| B. No |

20. Which of the existing courses are related to mental health? [Multiple choice questions]*

| A. Ethics and the rule of law |
| --- |
| B. Class meetings |
| C. Others: _________________ |

If you would like, please leave your contact information so that you can make it easier for us to follow up.
How do you address them?[edit]

_________________________________

Your contact information (phone, WeChat, email, QQ):[Fill in the blanks]

_________________________________

If you have other questions, please describe them in detail: [Fill in the blanks]

_________________________________
