# Supplementary material for: A Study on the Needs for Mental Health Courses for Middle School Students Based on Qualitative Interviews from Diverse Perspectives
Source: Research Square preprint supplement (doi:10.21203/rs.3.rs-7165019/v1), 2025-09-11
Supplement: Supplementary file 3 [file e6184afe7d2da05eb3749bc1.docx]

Questionnaire on Curriculum Design of Mental Health Education for Middle School Students (Teacher Version)

**Dear Sir/Madam! We appreciate you taking the time out of your hectic day to fill out this survey. The "curriculum design of mental health education for junior high school students" is the subject of this survey. It aims to understand the needs of mental health education for middle school students. I'm hoping for your assistance. Future courses on teenage mental health will benefit from your insightful feedback! Your present job and personal life won't be impacted by this anonymous survey. The investigator will maintain complete confidentiality regarding any information gathered during the survey. Again, I want to thank you for all of your help and support. I want everything the best for you and your health! This survey is entirely voluntary. If you are aware of and agree with the above instructions, please fill in the date of the day below:**

1. Your gender: [Multiple choice]*

| ○A. Male |
| --- |
| B. Female |

2. Your age:*

_________________________________

3. Are you currently a teacher? [Multiple choice]*

| A. Yes |
| --- |
| ○B. No |

4. The schools and subjects you teach are: [fill in the blanks]*

_________________________________

5. Do you work as a psychology teacher or similar position? [Multiple choice]*

| A. Yes |
| --- |
| ○B. No |

6. If yes, are you a full-time or part-time psychology teacher? [Multiple choice]*

| ○A. Full-time |
| --- |
| ○B. Part-time |

7. How long have you been teaching?*

_________________________________

8. Your first degree is: [Multiple choice questions]*

| ○A. Secondary school |
| --- |
| ○B. Junior college |
| ○C. Undergraduate course |
| D. Master's degree |
| ○E. Dr. |

9. What do you think should be included in the psychological education curriculum for junior high school children? [Multiple choice questions]*

| □A. Master learning methods and enhance interest in learning. |
| --- |
| □B. Training students 'thinking, attention and memory skills |
| C. Interpersonal communication skills: learn to communicate with parents, teachers and classmates |
| □D. Life education: cherish life, stay away from danger, and cultivate a positive and optimistic attitude towards life |
| □E. Emotional management: anger, depression, irritability, etc. |
| □F. Cultivation of behavior habits: regular life, independent learning, persistent exercise, etc. |
| □G. Psychosexual aspects: sexual education content such as getting along with the opposite sex, sexual awareness awakening, homosexual psychology, etc. |
| □H. Traditional moral education: respect teachers and education, respect the elderly and love the young |
| □I. Stress management: adaptive stress management, such as coping with setbacks and failures in life and study, coping with sudden major changes, major psychological events, etc.; non-adaptive stress management, such as Internet addiction, mobile phone addiction, drug abuse, excessive drinking, etc. |
| □J. Others: _________________ |

10.. Among the psychological education courses for junior high school children, which are more urgent or important? Please rate your score according to importance, 5 is the most important, 1 is the least important, and at least one is 5. [Matrix Scale]*

|  | 1 | 2 | 3 | 4 | 5 |
| --- | --- | --- | --- | --- | --- |
| A. Master learning methods, enhance interest in learning, | ○ | ○ | ○ | ○ | ○ |
| B. Training students 'thinking, attention and memory skills. | ○ | ○ | ○ | ○ | ○ |
| C. Interpersonal communication skills, learning to communicate with parents, teachers and classmates | ○ | ○ | ○ | ○ | ○ |
| D. Life education, cherish life, stay away from danger, and cultivate a positive and optimistic attitude towards life | ○ | ○ | ○ | ○ | ○ |
| E. Managing negative emotions (anger, depression, irritability, etc.) | ○ | ○ | ○ | ○ | ○ |
| F. Cultivation of behavior habits: regular life, independent learning, adherence to exercise, etc. | ○ | ○ | ○ | ○ | ○ |
| G. Psychosexual aspects: dealing with the opposite sex, sexual awareness awakening, homosexual psychology, etc. | ○ | ○ | ○ | ○ | ○ |
| H. Traditional moral education: respecting teachers and valuing education, respecting the elderly and loving the young. | ○ | ○ | ○ | ○ | ○ |
| I. Stress management: stress management: adaptive stress management, such as coping with setbacks and failures in life and study, coping with sudden major changes, major psychological events, etc.; non-adaptive stress management, such as Internet addiction, mobile phone addiction, drug abuse, excessive drinking, etc. | ○ | ○ | ○ | ○ | ○ |

11. According to the psychological state of junior high school children, formulate different grades (first two three), mental health education curriculum, do you think there is a need to distinguish? [Multiple choice questions] * [Multiple choice questions]*

| A. Needs |
| --- |
| B. Not required |

12.. If so, what kind of focus does the first child need? Please rate your score according to importance, 5 is the most important, 1 is the least important, and at least one is 5. [Matrix Scale]*

|  | 1 | 2 | 3 | 4 | 5 |
| --- | --- | --- | --- | --- | --- |
| A. Adapting to junior high school life and learning environment | ○ | ○ | ○ | ○ | ○ |
| B. Methodological guidance on learning | ○ | ○ | ○ | ○ | ○ |
| C. Interpersonal communication skills | ○ | ○ | ○ | ○ | ○ |
| D. Dealing with the opposite sex | ○ | ○ | ○ | ○ | ○ |
| E. Stress management | ○ | ○ | ○ | ○ | ○ |
| F. Emotional regulation | ○ | ○ | ○ | ○ | ○ |
| G. Education for life | ○ | ○ | ○ | ○ | ○ |
| H. Traditional moral education | ○ | ○ | ○ | ○ | ○ |

13. If so, what kind of focus does the second grade child need? Please rate your score according to importance, 5 is the most important, 1 is the least important, and at least one is 5. [Matrix Scale]*

|  | 1 | 2 | 3 | 4 | 5 |
| --- | --- | --- | --- | --- | --- |
| A. Adapting to junior high school life and learning environment | ○ | ○ | ○ | ○ | ○ |
| B. Methodological guidance on learning | ○ | ○ | ○ | ○ | ○ |
| C. Interpersonal communication skills | ○ | ○ | ○ | ○ | ○ |
| D. Dealing with the opposite sex | ○ | ○ | ○ | ○ | ○ |
| E. Stress management | ○ | ○ | ○ | ○ | ○ |
| F. Emotional regulation | ○ | ○ | ○ | ○ | ○ |
| G. Education for life | ○ | ○ | ○ | ○ | ○ |
| H. Traditional moral education | ○ | ○ | ○ | ○ | ○ |

14. If so, what kind of focus does the third-grade child need? Please rate your score according to importance, 5 is the most important, 1 is the least important, and at least one is 5. [Matrix Scale]*

|  | 1 | 2 | 3 | 4 | 5 |
| --- | --- | --- | --- | --- | --- |
| A. Adapting to junior high school life and learning environment | ○ | ○ | ○ | ○ | ○ |
| B. Methodological guidance on learning | ○ | ○ | ○ | ○ | ○ |
| C. Interpersonal communication skills | ○ | ○ | ○ | ○ | ○ |
| D. Dealing with the opposite sex | ○ | ○ | ○ | ○ | ○ |
| E. Stress management | ○ | ○ | ○ | ○ | ○ |
| F. Emotional regulation | ○ | ○ | ○ | ○ | ○ |
| G. Education for life | ○ | ○ | ○ | ○ | ○ |
| H. Traditional moral education | ○ | ○ | ○ | ○ | ○ |

15. What kind of form do you think can be adopted for psychological education courses for junior high school children, and what kind of form is better? [Multiple choice questions]*

| □A. Role play |
| --- |
| □B. Scenario simulation |
| □C. Group learning |
| □D. Class meeting lectures |
| □E. Written information (pamphlets) |
| □F. Video |
| □G. Other_________________ |

16. Do you think junior high school teachers need to study together in psychological education curriculum for junior high school children? [Multiple choice]*

| A. Needs |
| --- |
| B. Not required |

17. If necessary, please select what you want to know [Multiple choice questions]*

| □A Master learning methods and enhance learning interest |
| --- |
| □B. Training students 'thinking, attention and memory skills |
| □C. Life education, cherish life, stay away from danger, and cultivate a positive and optimistic attitude towards life |
| □D. Manage bad emotions (anger, depression, irritability), etc. |
| □E. Stress management |
| □F. Cultivation of behavior habits: regular life, independent learning, persistent exercise, etc. |
| □G. Sexual psychology: sexual education content such as getting along with the opposite sex, sexual consciousness awakening, homosexual psychology, etc. |
| □H. Traditional moral education: respect teachers and education, respect the elderly and love the young |
| □I. Recognition of anxiety and depression |
| J. Early recognition of mental illness |
| □L. Other_________________ |

18. Please list their importance: please rate them according to their importance, with 5 being the most important, 1 being the least important, and at least one being 5. [Matrix Scale]*

|  | 1 | 2 | 3 | 4 | 5 |
| --- | --- | --- | --- | --- | --- |
| A. Master learning methods and enhance interest in learning | ○ | ○ | ○ | ○ | ○ |
| B. Training students 'thinking, attention and memory skills | ○ | ○ | ○ | ○ | ○ |
| C. Interpersonal communication skills, learning to communicate with parents, teachers and classmates | ○ | ○ | ○ | ○ | ○ |
| D. Life education, cherish life, stay away from danger, and cultivate a positive and optimistic attitude towards life | ○ | ○ | ○ | ○ | ○ |
| E. Managing bad emotions (anger, depression, irritability, etc.) | ○ | ○ | ○ | ○ | ○ |
| F. Stress management | ○ | ○ | ○ | ○ | ○ |
| G. Cultivation of behavior habits: regular life, independent learning, adherence to exercise, etc. | ○ | ○ | ○ | ○ | ○ |
| H. Psychosexual aspects: sexual education content such as dealing with the opposite sex, sexual awareness awakening, homosexual psychology, etc. | ○ | ○ | ○ | ○ | ○ |
| I. Traditional moral education: respect for teachers, respect for the elderly and love for the young | ○ | ○ | ○ | ○ | ○ |
| J. Recognition of anxiety and depression | ○ | ○ | ○ | ○ | ○ |
| K. Early recognition of mental illness | ○ | ○ | ○ | ○ | ○ |
| L. Other | ○ | ○ | ○ | ○ | ○ |

19. For junior high school students psychological education curriculum, you think the appropriate hours a semester hours are: [multiple choice questions]*

| ○A.6-8 hours |
| --- |
| ○B.10-12 hours |
| ○C.14-16 periods |
| D. 18 -20 hours |
| ○E.22-24 hours |
| ○F.24 hours or more |

20. How do you think the psychological education curriculum for junior high school students should be set up? [Multiple choice]*

| ○A. Courses devoted to psychological education |
| --- |
| ○B. Integration with class meetings |
| ○C. Integration with ethics and law courses |
| ○D. Other_________________ |

21. Who do you think should be the speaker of psychological education courses for junior high school students? [Multiple choice]*

| ○A. School psychology teacher |
| --- |
| ○B. Head teacher |
| ○C. School-appointed teacher |
| ○D. Hire professional psychosocial teachers |
| ○E. Other (please specify)_________________ |

22. If the psychological education courses for junior high school students are taught by school teachers, do you think it is necessary to receive corresponding training? [Multiple choice]*

| ○ Need |
| --- |
| ○ Not required |
| ○ Other (please specify)________________ |

23. What do you think are the challenges and difficulties faced by the school's lecturers in the psychological education curriculum for junior high school students: [Multiple choice questions]*

| D. Do not know how to teach |
| --- |
| □ B Worried about the child's acceptance |
| □C Increased workload |
| D. Worry about things you can't handle. |
| □E Other (please specify)______________ |

24. Do you think parents need to participate in the psychological education curriculum for junior high school students? [Multiple choice]*

| A needs |
| --- |
| ○B Not required |

25. For the psychological education courses for junior high school students, what do you think parents need to learn and their importance include (multiple-choice questions): Please rate according to the importance, 5 points are the most important, 1 point is the least important, and at least one is 5 points. [Matrix Scale]*

|  | 1 | 2 | 3 | 4 | 5 |
| --- | --- | --- | --- | --- | --- |
| A. Interpersonal communication skills, learning to communicate with children | ○ | ○ | ○ | ○ | ○ |
| B. Life education, cherish life, stay away from danger, and cultivate a positive and optimistic attitude towards life | ○ | ○ | ○ | ○ | ○ |
| C. Self-management of negative emotions (anger, depression, irritability, etc.) | ○ | ○ | ○ | ○ | ○ |
| D. Stress management | ○ | ○ | ○ | ○ | ○ |
| E. Psychosexual aspects of children | ○ | ○ | ○ | ○ | ○ |
| F. Traditional moral education | ○ | ○ | ○ | ○ | ○ |
| G. Recognition of anxiety and depression | ○ | ○ | ○ | ○ | ○ |
| H. Early recognition of psychosis | ○ | ○ | ○ | ○ | ○ |
| I. Other | ○ | ○ | ○ | ○ | ○ |

26. Does your school offer special mental health education courses? [Multiple choice]*

| A. Yes |
| --- |
| ○B. No |

27. Which of the existing courses are related to mental health? [Multiple choice questions]

| □A. Ethics and the rule of law |
| --- |
| □B. Class meetings |
| □C. Others: _________________ |

If you would like, please leave your contact information so that you can make it easier for us to follow up.
How do you address me: [fill in the blank]

_________________________________

Your contact information (phone, WeChat, QQ, email can be):[fill in the blank]

_________________________________

If you have other questions, please describe them in detail: [Fill in the blanks]

_________________________________

Please fill in the answer date (x month x day):[Fill in the blank]*

_________________________________
